# Supplementary material for: Molecular Mechanism Study on the Effect of Microstructural Differences of Octylphenol Polyoxyethylene Ether (OPEO) Surfactants on the Wettability of Anthracite
Source: MDPI journal article supplement (doi:10.3390/molecules28124748), 2023-06-13
Supplement: s1 [file s1]

## Supplementary Materials

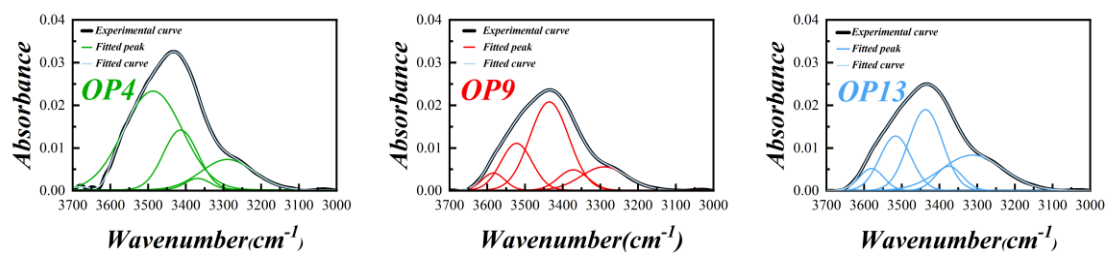

Figure S1. FTIR fitting curve in the range of 3700-3000 cm<sup>-1</sup>.

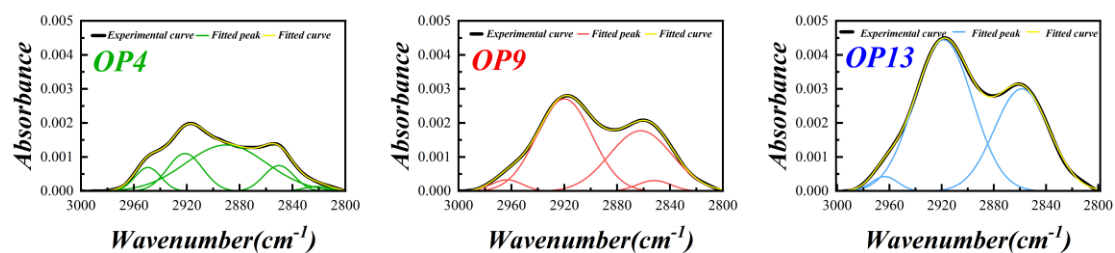

Figure S2. FTIR fitting curve in the range of 3000-2800 cm<sup>-1</sup>.
